# Supplementary material for: Identifying geographical regions serviced by hospitals to assess laboratory-based outcomes
Source: HighWire-hosted journal article supplement (doi:10.1136/bmjopen-2012-001921), 2013-01-01

**Appendix 2, Figure 1.** Hospitals with emergency departments in Southwestern Ontario as of 2009. See legend for further details.

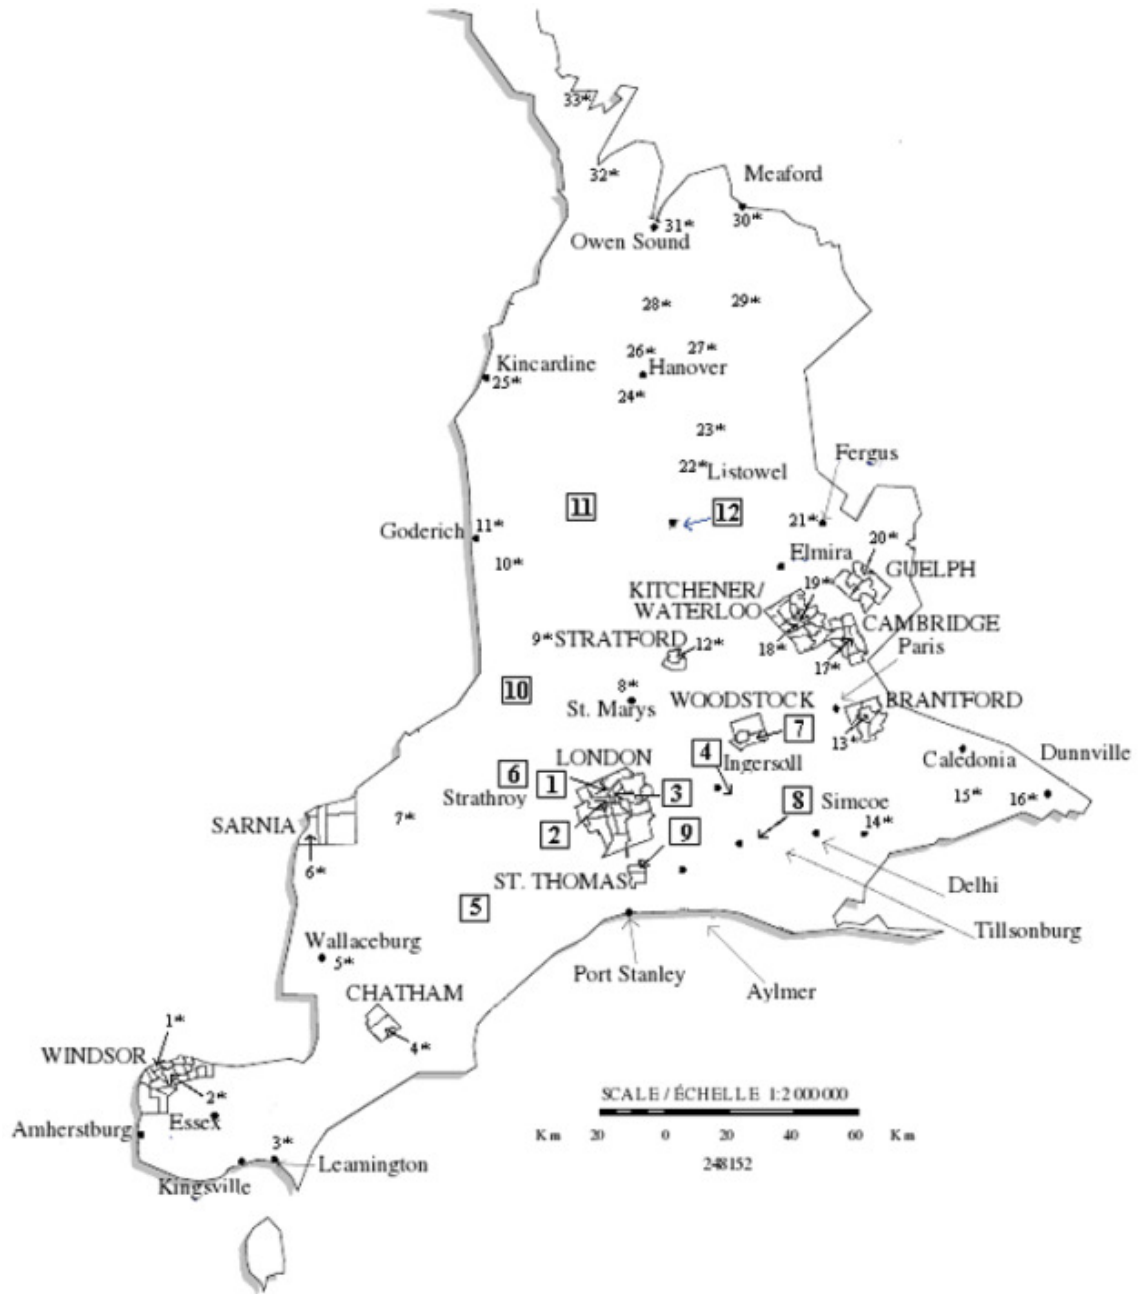

Supplement: bmjopen-2012-001921supp_appendix2.pdf [file bmjopen-2012-001921supp_appendix2.pdf]
